# Supplementary material for: Nanoscale defolding influence of polypeptides in the charge-transfer process through an organic–inorganic nanohybrid system
Source: Royal Society of Chemistry journal article supplement (doi:10.1039/c8nr03582b), 2018-01-01
Supplement: c8nr03582b1.pdf [file c8nr03582b1.pdf]

# Nanoscale Defolding Influence of Polypeptide in Charge-Transfer Process through Organic-Inorganic Nano Hybrid System<sup>†</sup>

Partha Roy,<sup>\*a</sup> Nirit Kantor Uriel,<sup>b</sup> and Anurag Prakash Sunda<sup>\*a</sup>

<sup>a</sup> Department of Chemistry, School of Chemical Sciences & Pharmacy, Central University of Rajasthan, Ajmer 305817 India.  
Email: partharoy@curaj.ac.in, apsunda@curaj.ac.in/anurag.sunda@gmail.com

<sup>b</sup> Department of Chemical Physics, Weizmann Institute of Science, Rehovot 76100, Israel.

## <sup>†</sup>Supporting Information

**AFM measurement:** The coverage of CdSe nanoparticles is found to be higher in the case of oligopeptide modified Au than the samples modified with mixed monolayers of oligopeptide and monothiol, where the thiol (head) regions are diluted by the presence of monothiol molecules.

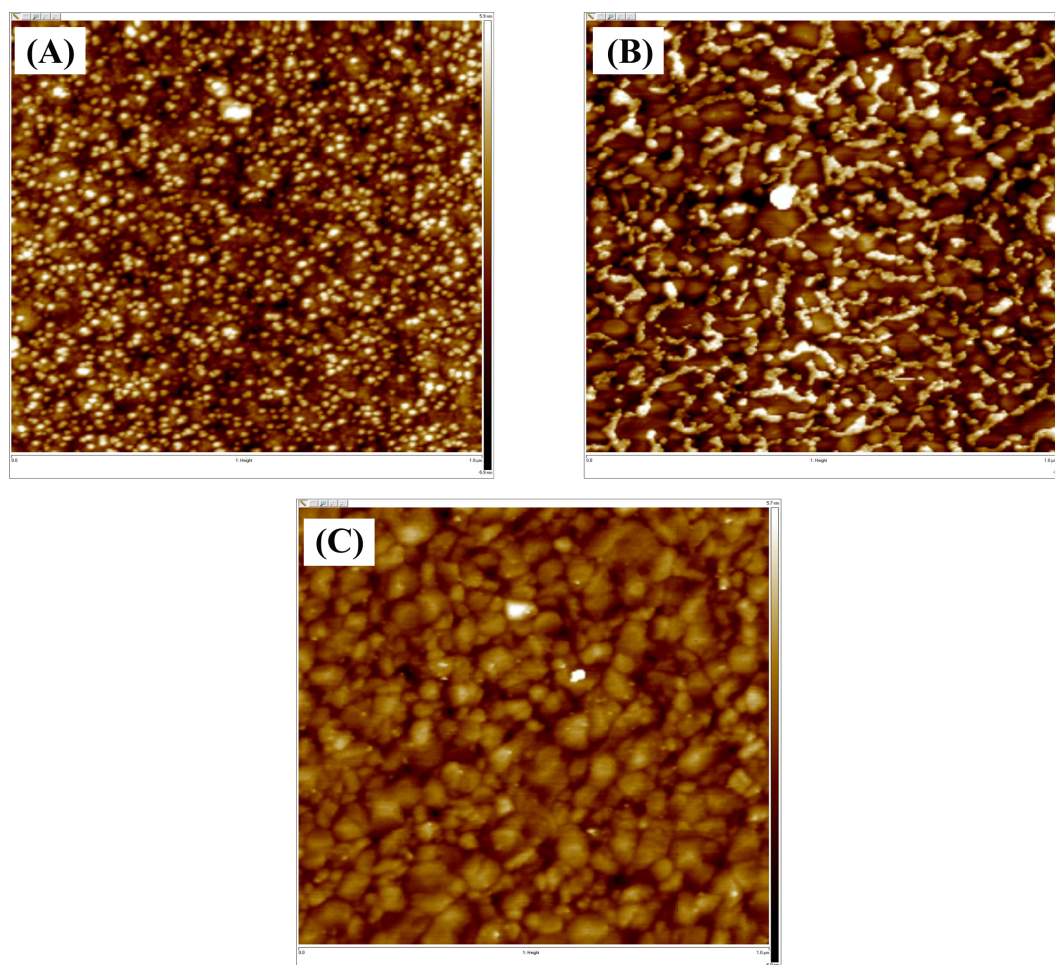

**Figure S1:** AFM topography images of oligopeptide modified Au surface with (a) and without (c) CdSe nanoparticles. (b) represents mixed monolayer (Oligopeptide + monothiol) modified Au with CdSe nanoparticles respectively.

**Evaporation of Au on silicon:** An 8 nm Ti (Kurt, 99.9%) adhesive layer was deposited at a rate of 0.2 Å/s on a polished p-type single-crystal silicon wafer in an electron beam evaporator. Thereafter, 150 nm gold (Kurt, 99.999%) layer was grown at a slow evaporation rate of 0.2 Å/s on the same silicon wafer.
